# Supplementary material for: Colon organoid formation and cryptogenesis are stimulated by growth factors secreted from myofibroblasts
Source: PubMed Central journal article supplement (PMC6013242; doi:10.1371/journal.pone.0199412), 2018-06-21
Supplement: pone.0199412.s008.pdf [file pone.0199412.s008.pdf]

## **Supporting Information (S1 Text)**

### **Effects of cYH2CM on the formation of small intestinal crypts *in vitro***

In normal culture condition without cYH2CM, *small intestinal* crypts form enterospheres ( $39\pm 11\%$ ) as well as enteroids with less than or 3 buds ( $57\pm 9\%$ ). Only a small percentage of enteroids have greater than 3 buds ( $5\pm 2\%$ ) (S6A Fig, left most bar of each category)[23]. The cYH2CM, containing CoSFs, stimulates the size of both the enterospheres and enteroid with crypts (S6B Fig). Interestingly, increasing the cYH2CM concentration leads to more enteroids having greater than 3 buds (S6A and S6B Fig). At the highest cYH2CM concentrations (i.e. 50%, v/v), there appear to be more cysts ( $37\pm 4\%$  of the total counts) formed compared to enteroids having  $>3$  buds ( $9\pm 2\%$ ). At the highest cYH2CM concentration (50%, v/v) the increased proportion of cysts is associated with a lower proportion of enteroids with crypts. Increasing the cYH2CM concentration does not change the proportion of enterospheres ( $44\pm 5\%$ ) (S6A Fig). The total organoid formation efficiency (enterosphere + enteroids + cysts) of the small intestinal crypt culture increases from  $59\pm 6\%$  (with no cYH2CM) to  $89\pm 25\%$  at 30% v/v of cYH2CM but then decreases to  $54\pm 7\%$  at 50% v/v of YH2CM (S6C Fig).

### **Actions of CoSF(s) from Murine WEHI-YH2 cells are species specific**

The CoSF(s) from the murine WEHI-YH2 cells are species specific. The cross-specificity of the colonoid-stimulating factors (CoSFs) in YH2CM was tested by culturing human colonoid cultures with cYH2CM (30%, v/v). cYH2CM did not stimulate the formation of human colon. In contrast, conditioned medium from a human

colon myofibroblast cell line (30%, v/v) stimulates the formation of human colon organoids (S7 Fig).
